# Supplementary material
Source: publisher figshare collection journal article supplement (https://acs.figshare.com/ndownloader/files/4597270)
Supplement: Supplementary file 1 [file 4597270]

  
data_th271 
  
_audit_creation_method            SHELXL-97 
_chemical_name_systematic 
; 
 ? 
; 
_chemical_name_common             'Et4N[Fe(S-p-tolyl)2(NO)2]' 
_chemical_melting_point           ? 
_chemical_formula_moiety          'C22 H34 Fe N3 O2 S2, C2 H4 O0.5' 
_chemical_formula_sum 
 'C24 H38 Fe N3 O2.50 S2' 
_chemical_formula_weight          528.54 
  
loop_ 
 _atom_type_symbol 
 _atom_type_description 
 _atom_type_scat_dispersion_real 
 _atom_type_scat_dispersion_imag 
 _atom_type_scat_source 
 'C'  'C'   0.0033   0.0016 
 'International Tables Vol C Tables 4.2.6.8 and 6.1.1.4' 
 'H'  'H'   0.0000   0.0000 
 'International Tables Vol C Tables 4.2.6.8 and 6.1.1.4' 
 'N'  'N'   0.0061   0.0033 
 'International Tables Vol C Tables 4.2.6.8 and 6.1.1.4' 
 'O'  'O'   0.0106   0.0060 
 'International Tables Vol C Tables 4.2.6.8 and 6.1.1.4' 
 'S'  'S'   0.1246   0.1234 
 'International Tables Vol C Tables 4.2.6.8 and 6.1.1.4' 
 'Fe'  'Fe'   0.3463   0.8444 
 'International Tables Vol C Tables 4.2.6.8 and 6.1.1.4' 
  
_symmetry_cell_setting            Monoclinic 
_symmetry_space_group_name_H-M    P2(1)/n 
  
loop_ 
 _symmetry_equiv_pos_as_xyz 
 'x, y, z' 
 '-x+1/2, y+1/2, -z+1/2' 
 '-x, -y, -z' 
 'x-1/2, -y-1/2, z-1/2' 
  
_cell_length_a                    8.979(3) 
_cell_length_b                    30.661(10) 
_cell_length_c                    10.361(3) 
_cell_angle_alpha                 90.00 
_cell_angle_beta                  103.129(5) 
_cell_angle_gamma                 90.00 
_cell_volume                      2777.8(15) 
_cell_formula_units_Z             4 
_cell_measurement_temperature     110(2) 
_cell_measurement_reflns_used     6032 
_cell_measurement_theta_min       2.42 
_cell_measurement_theta_max       28.30 
  
_exptl_crystal_description        block 
_exptl_crystal_colour             black
_exptl_crystal_size_max           0.1 
_exptl_crystal_size_mid           0.1 
_exptl_crystal_size_min           0.1 
_exptl_crystal_density_meas       ? 
_exptl_crystal_density_diffrn     1.264 
_exptl_crystal_density_method     'not measured' 
_exptl_crystal_F_000              1124 
_exptl_absorpt_coefficient_mu     0.719 
_exptl_absorpt_correction_type    empirical
_exptl_absorpt_correction_T_min   0.9316
_exptl_absorpt_correction_T_max   0.9316 
_exptl_absorpt_process_details    SADABS 
  
_exptl_special_details 
; 
 ? 
; 
  
_diffrn_ambient_temperature       110(2) 
_diffrn_radiation_wavelength      0.71073 
_diffrn_radiation_type            MoK\a 
_diffrn_radiation_source          'fine-focus sealed tube' 
_diffrn_radiation_monochromator   graphite 
_diffrn_measurement_device_type   'CCD area detector' 
_diffrn_measurement_method        'phi and omega scans' 
_diffrn_detector_area_resol_mean  ? 
_diffrn_standards_number          ? 
_diffrn_standards_interval_count  ? 
_diffrn_standards_interval_time   ? 
_diffrn_standards_decay_%         ? 
_diffrn_reflns_number             43795 
_diffrn_reflns_av_R_equivalents   0.0357 
_diffrn_reflns_av_sigmaI/netI     0.0225 
_diffrn_reflns_limit_h_min        -11 
_diffrn_reflns_limit_h_max        11 
_diffrn_reflns_limit_k_min        -39 
_diffrn_reflns_limit_k_max        39 
_diffrn_reflns_limit_l_min        -13 
_diffrn_reflns_limit_l_max        13 
_diffrn_reflns_theta_min          2.12 
_diffrn_reflns_theta_max          27.10 
_reflns_number_total              6128 
_reflns_number_gt                 5560 
_reflns_threshold_expression      >2sigma(I) 
  
_computing_data_collection        'Bruker SMART' 
_computing_cell_refinement        'Bruker SMART' 
_computing_data_reduction         'Bruker SAINT' 
_computing_structure_solution     'SHELXS-97 (Sheldrick, 1990)' 
_computing_structure_refinement   'SHELXL-97 (Sheldrick, 1997)' 
_computing_molecular_graphics     'Bruker SHELXTL' 
_computing_publication_material   'Bruker SHELXTL' 
  
_refine_special_details 
; 
 Refinement of F^2^ against ALL reflections.  The weighted R-factor wR and 
 goodness of fit S are based on F^2^, conventional R-factors R are based 
 on F, with F set to zero for negative F^2^. The threshold expression of 
 F^2^ > 2sigma(F^2^) is used only for calculating R-factors(gt) etc. and is 
 not relevant to the choice of reflections for refinement.  R-factors based 
 on F^2^ are statistically about twice as large as those based on F, and R- 
 factors based on ALL data will be even larger. 
; 
  
_refine_ls_structure_factor_coef  Fsqd 
_refine_ls_matrix_type            full 
_refine_ls_weighting_scheme       calc 
_refine_ls_weighting_details 
 'calc w=1/[\s^2^(Fo^2^)+(0.0361P)^2^+1.1728P] where P=(Fo^2^+2Fc^2^)/3' 
_atom_sites_solution_primary      direct 
_atom_sites_solution_secondary    difmap 
_atom_sites_solution_hydrogens    geom 
_refine_ls_hydrogen_treatment     constr
_refine_ls_extinction_method      none 
_refine_ls_extinction_coef        ? 
_refine_ls_number_reflns          6128 
_refine_ls_number_parameters      318 
_refine_ls_number_restraints      40 
_refine_ls_R_factor_all           0.0404 
_refine_ls_R_factor_gt            0.0355 
_refine_ls_wR_factor_ref          0.0818 
_refine_ls_wR_factor_gt           0.0795 
_refine_ls_goodness_of_fit_ref    1.137 
_refine_ls_restrained_S_all       1.134 
_refine_ls_shift/su_max           0.001 
_refine_ls_shift/su_mean          0.000 
  
loop_ 
 _atom_site_label 
 _atom_site_type_symbol 
 _atom_site_fract_x 
 _atom_site_fract_y 
 _atom_site_fract_z 
 _atom_site_U_iso_or_equiv 
 _atom_site_adp_type 
 _atom_site_occupancy 
 _atom_site_symmetry_multiplicity 
 _atom_site_calc_flag 
 _atom_site_refinement_flags 
 _atom_site_disorder_assembly 
 _atom_site_disorder_group 
Fe1 Fe 0.97971(3) 0.152517(8) 0.67510(2) 0.01917(7) Uani 1 1 d . . . 
N3 N 0.89376(15) 0.34725(4) 0.80439(13) 0.0173(3) Uani 1 1 d . . . 
S2 S 0.92158(5) 0.192234(13) 0.47797(4) 0.02128(10) Uani 1 1 d . . . 
N2 N 1.03527(16) 0.18583(5) 0.80977(14) 0.0227(3) Uani 1 1 d . . . 
S3 S 1.19497(5) 0.108525(14) 0.68910(4) 0.02198(10) Uani 1 1 d . . . 
N1 N 0.81686(16) 0.12236(5) 0.67024(14) 0.0234(3) Uani 1 1 d . . . 
C17 C 1.04595(18) 0.36969(5) 0.79668(17) 0.0218(3) Uani 1 1 d . . . 
H17A H 1.1316 0.3517 0.8462 0.026 Uiso 1 1 calc R . . 
H17B H 1.0535 0.3703 0.7028 0.026 Uiso 1 1 calc R . . 
C8 C 1.03181(18) 0.24187(5) 0.49770(15) 0.0171(3) Uani 1 1 d . . . 
C1 C 1.15668(19) 0.07183(5) 0.54953(16) 0.0206(3) Uani 1 1 d . . . 
C9 C 1.17504(18) 0.24594(5) 0.58925(15) 0.0181(3) Uani 1 1 d . . . 
H9 H 1.2155 0.2218 0.6434 0.022 Uiso 1 1 calc R . . 
C21 C 0.88084(19) 0.34145(5) 0.95023(15) 0.0186(3) Uani 1 1 d . . . 
H21A H 0.8940 0.3703 0.9943 0.022 Uiso 1 1 calc R . . 
H21B H 0.7766 0.3310 0.9504 0.022 Uiso 1 1 calc R . . 
C22 C 0.99732(19) 0.30959(5) 1.03186(16) 0.0213(3) Uani 1 1 d . . . 
H22A H 0.9815 0.3078 1.1222 0.032 Uiso 1 1 calc R . . 
H22B H 1.1012 0.3200 1.0347 0.032 Uiso 1 1 calc R . . 
H22C H 0.9836 0.2807 0.9907 0.032 Uiso 1 1 calc R . . 
C10 C 1.25805(18) 0.28536(5) 0.60093(16) 0.0201(3) Uani 1 1 d . . . 
H10 H 1.3530 0.2873 0.6638 0.024 Uiso 1 1 calc R . . 
O2 O 1.05681(17) 0.20611(4) 0.91090(13) 0.0348(3) Uani 1 1 d . . . 
C19 C 0.75575(18) 0.37554(5) 0.73663(17) 0.0221(3) Uani 1 1 d . . . 
H19A H 0.6607 0.3596 0.7393 0.027 Uiso 1 1 calc R . . 
H19B H 0.7567 0.4027 0.7887 0.027 Uiso 1 1 calc R . . 
C4 C 1.1119(2) 0.01369(5) 0.32396(17) 0.0241(4) Uani 1 1 d . . . 
C15 C 0.89379(19) 0.30259(5) 0.73504(16) 0.0212(3) Uani 1 1 d . . . 
H15A H 0.9000 0.3078 0.6421 0.025 Uiso 1 1 calc R . . 
H15B H 0.9871 0.2865 0.7792 0.025 Uiso 1 1 calc R . . 
C13 C 0.97628(18) 0.27878(5) 0.41769(15) 0.0196(3) Uani 1 1 d . . . 
H13 H 0.8806 0.2770 0.3558 0.024 Uiso 1 1 calc R . . 
O1 O 0.70153(14) 0.10671(4) 0.68969(14) 0.0328(3) Uani 1 1 d . . . 
C2 C 1.02066(19) 0.07303(6) 0.44877(18) 0.0265(4) Uani 1 1 d . . . 
H2 H 0.9423 0.0932 0.4551 0.032 Uiso 1 1 calc R . . 
C11 C 1.20362(19) 0.32214(5) 0.52135(16) 0.0205(3) Uani 1 1 d . . . 
C12 C 1.06134(19) 0.31811(5) 0.42888(15) 0.0201(3) Uani 1 1 d . . . 
H12 H 1.0224 0.3421 0.3735 0.024 Uiso 1 1 calc R . . 
C5 C 1.2478(2) 0.01241(6) 0.42496(18) 0.0265(4) Uani 1 1 d . . . 
H5 H 1.3255 -0.0080 0.4185 0.032 Uiso 1 1 calc R . . 
C16 C 0.7538(2) 0.27343(6) 0.73458(17) 0.0245(4) Uani 1 1 d . . . 
H16A H 0.7639 0.2460 0.6887 0.037 Uiso 1 1 calc R . . 
H16B H 0.6606 0.2885 0.6887 0.037 Uiso 1 1 calc R . . 
H16C H 0.7479 0.2672 0.8261 0.037 Uiso 1 1 calc R . . 
C6 C 1.2705(2) 0.04080(6) 0.53527(17) 0.0246(4) Uani 1 1 d . . . 
H6 H 1.3632 0.0392 0.6011 0.030 Uiso 1 1 calc R . . 
C3 C 1.0000(2) 0.04458(6) 0.33875(18) 0.0275(4) Uani 1 1 d . . . 
H3 H 0.9077 0.0463 0.2725 0.033 Uiso 1 1 calc R . . 
C18 C 1.0661(2) 0.41660(6) 0.85161(18) 0.0272(4) Uani 1 1 d . . . 
H18A H 1.1652 0.4281 0.8428 0.041 Uiso 1 1 calc R . . 
H18B H 1.0619 0.4164 0.9453 0.041 Uiso 1 1 calc R . . 
H18C H 0.9840 0.4351 0.8016 0.041 Uiso 1 1 calc R . . 
C14 C 1.2964(2) 0.36474(6) 0.53562(18) 0.0275(4) Uani 1 1 d . . . 
H14A H 1.3485 0.3690 0.6287 0.041 Uiso 1 1 calc R . . 
H14B H 1.2275 0.3893 0.5059 0.041 Uiso 1 1 calc R . . 
H14C H 1.3725 0.3631 0.4813 0.041 Uiso 1 1 calc R . . 
C20 C 0.7511(2) 0.38799(7) 0.59169(18) 0.0328(4) Uani 1 1 d . . . 
H20A H 0.6602 0.4058 0.5568 0.049 Uiso 1 1 calc R . . 
H20B H 0.7469 0.3614 0.5383 0.049 Uiso 1 1 calc R . . 
H20C H 0.8431 0.4046 0.5877 0.049 Uiso 1 1 calc R . . 
C7 C 1.0843(2) -0.01671(6) 0.20333(19) 0.0320(4) Uani 1 1 d . . . 
H7A H 1.0169 -0.0406 0.2164 0.048 Uiso 1 1 calc R . . 
H7B H 1.1822 -0.0286 0.1929 0.048 Uiso 1 1 calc R . . 
H7C H 1.0363 -0.0003 0.1236 0.048 Uiso 1 1 calc R . . 
C3S C 0.5201(14) 0.0288(5) 0.9171(15) 0.047(3) Uani 0.50 1 d PU A -1 
H3S1 H 0.5674 0.0232 0.8411 0.056 Uiso 0.50 1 calc PR A -1 
H3S2 H 0.5100 0.0607 0.9274 0.056 Uiso 0.50 1 calc PR A -1 
C4S C 0.3627(5) 0.00608(14) 0.8965(5) 0.0295(9) Uani 0.50 1 d PU A -1 
H4S1 H 0.2931 0.0229 0.9394 0.035 Uiso 0.50 1 calc PR A -1 
H4S2 H 0.3149 0.0031 0.8009 0.035 Uiso 0.50 1 calc PR A -1 
C2S C 0.6142(6) 0.0088(3) 1.0421(6) 0.0463(13) Uani 0.50 1 d PU A -1 
H2S1 H 0.6412 0.0311 1.1128 0.056 Uiso 0.50 1 calc PR A -1 
H2S2 H 0.7097 -0.0039 1.0258 0.056 Uiso 0.50 1 calc PR A -1 
C1S C 0.5123(14) -0.0273(4) 1.0824(10) 0.040(2) Uani 0.50 1 d PU A -1 
H1S1 H 0.5730 -0.0537 1.1137 0.048 Uiso 0.50 1 calc PR A -1 
H1S2 H 0.4634 -0.0169 1.1533 0.048 Uiso 0.50 1 calc PR A -1 
O1S O 0.3954(4) -0.03622(12) 0.9578(3) 0.0417(8) Uani 0.50 1 d PU A -1 
  
loop_ 
 _atom_site_aniso_label 
 _atom_site_aniso_U_11 
 _atom_site_aniso_U_22 
 _atom_site_aniso_U_33 
 _atom_site_aniso_U_23 
 _atom_site_aniso_U_13 
 _atom_site_aniso_U_12 
Fe1 0.01929(13) 0.02154(13) 0.01740(12) 0.00060(9) 0.00564(9) -0.00048(9) 
N3 0.0153(6) 0.0195(7) 0.0180(6) -0.0004(5) 0.0060(5) 0.0010(5) 
S2 0.0202(2) 0.0249(2) 0.01686(19) 0.00046(15) 0.00046(15) -0.00444(15) 
N2 0.0253(7) 0.0228(7) 0.0206(7) 0.0027(6) 0.0064(6) 0.0026(6) 
S3 0.0187(2) 0.0274(2) 0.01959(19) 0.00036(16) 0.00378(16) 0.00054(16) 
N1 0.0221(7) 0.0244(7) 0.0249(7) 0.0035(6) 0.0076(6) 0.0022(6) 
C17 0.0151(7) 0.0263(9) 0.0260(8) 0.0042(7) 0.0086(7) -0.0010(6) 
C8 0.0160(7) 0.0227(8) 0.0133(7) -0.0035(6) 0.0048(6) -0.0001(6) 
C1 0.0206(8) 0.0209(8) 0.0219(8) 0.0027(6) 0.0082(7) -0.0028(6) 
C9 0.0165(7) 0.0235(8) 0.0146(7) 0.0014(6) 0.0039(6) 0.0039(6) 
C21 0.0192(8) 0.0224(8) 0.0159(7) -0.0026(6) 0.0076(6) -0.0018(6) 
C22 0.0194(8) 0.0249(8) 0.0187(8) 0.0004(6) 0.0025(6) -0.0024(6) 
C10 0.0140(7) 0.0282(9) 0.0178(7) -0.0034(6) 0.0032(6) -0.0009(6) 
O2 0.0454(8) 0.0325(7) 0.0248(7) -0.0076(6) 0.0045(6) 0.0024(6) 
C19 0.0157(8) 0.0235(8) 0.0258(8) 0.0014(7) 0.0018(7) 0.0026(6) 
C4 0.0277(9) 0.0192(8) 0.0282(9) 0.0010(7) 0.0120(7) -0.0032(7) 
C15 0.0254(8) 0.0210(8) 0.0192(8) -0.0030(6) 0.0093(7) 0.0009(6) 
C13 0.0173(7) 0.0270(8) 0.0136(7) -0.0014(6) 0.0016(6) 0.0029(6) 
O1 0.0228(6) 0.0358(7) 0.0410(8) 0.0069(6) 0.0098(6) -0.0036(5) 
C2 0.0187(8) 0.0293(9) 0.0322(9) -0.0053(7) 0.0072(7) 0.0013(7) 
C11 0.0224(8) 0.0217(8) 0.0199(8) -0.0042(6) 0.0099(7) -0.0011(6) 
C12 0.0242(8) 0.0213(8) 0.0160(7) 0.0015(6) 0.0071(6) 0.0051(6) 
C5 0.0298(9) 0.0208(8) 0.0315(9) 0.0062(7) 0.0122(8) 0.0074(7) 
C16 0.0259(9) 0.0248(9) 0.0218(8) -0.0053(7) 0.0030(7) -0.0024(7) 
C6 0.0239(8) 0.0254(9) 0.0245(8) 0.0066(7) 0.0053(7) 0.0042(7) 
C3 0.0183(8) 0.0308(9) 0.0322(9) -0.0069(7) 0.0035(7) -0.0025(7) 
C18 0.0219(8) 0.0274(9) 0.0321(9) 0.0018(7) 0.0055(7) -0.0057(7) 
C14 0.0287(9) 0.0254(9) 0.0304(9) -0.0040(7) 0.0106(8) -0.0022(7) 
C20 0.0315(10) 0.0359(10) 0.0268(9) 0.0066(8) -0.0020(8) 0.0003(8) 
C7 0.0396(11) 0.0230(9) 0.0351(10) -0.0040(8) 0.0119(9) 0.0016(8) 
C3S 0.019(4) 0.055(5) 0.065(5) 0.006(3) 0.004(3) -0.017(3) 
C4S 0.030(2) 0.025(2) 0.033(2) 0.0042(18) 0.006(2) -0.0038(16) 
C2S 0.028(2) 0.069(5) 0.039(3) -0.011(3) 0.001(2) -0.004(3) 
C1S 0.040(6) 0.050(5) 0.026(3) -0.002(3) -0.004(3) 0.020(4) 
O1S 0.055(2) 0.0302(16) 0.0355(17) 0.0052(15) 0.0022(15) -0.0075(16) 
  
_geom_special_details 
; 
 All esds (except the esd in the dihedral angle between two l.s. planes) 
 are estimated using the full covariance matrix.  The cell esds are taken 
 into account individually in the estimation of esds in distances, angles 
 and torsion angles; correlations between esds in cell parameters are only 
 used when they are defined by crystal symmetry.  An approximate (isotropic) 
 treatment of cell esds is used for estimating esds involving l.s. planes. 
; 
  
loop_ 
 _geom_bond_atom_site_label_1 
 _geom_bond_atom_site_label_2 
 _geom_bond_distance 
 _geom_bond_site_symmetry_2 
 _geom_bond_publ_flag 
Fe1 N2 1.7096(15) . ? 
Fe1 N1 1.7210(15) . ? 
Fe1 S2 2.3329(7) . ? 
Fe1 S3 2.3343(7) . ? 
N3 C19 1.544(2) . ? 
N3 C15 1.546(2) . ? 
N3 C17 1.548(2) . ? 
N3 C21 1.552(2) . ? 
S2 C8 1.8016(17) . ? 
N2 O2 1.1958(19) . ? 
S3 C1 1.8026(18) . ? 
N1 O1 1.1992(19) . ? 
C17 C18 1.542(2) . ? 
C17 H17A 0.9900 . ? 
C17 H17B 0.9900 . ? 
C8 C9 1.419(2) . ? 
C8 C13 1.424(2) . ? 
C1 C2 1.415(2) . ? 
C1 C6 1.428(2) . ? 
C9 C10 1.411(2) . ? 
C9 H9 0.9500 . ? 
C21 C22 1.537(2) . ? 
C21 H21A 0.9900 . ? 
C21 H21B 0.9900 . ? 
C22 H22A 0.9800 . ? 
C22 H22B 0.9800 . ? 
C22 H22C 0.9800 . ? 
C10 C11 1.417(2) . ? 
C10 H10 0.9500 . ? 
C19 C20 1.541(2) . ? 
C19 H19A 0.9900 . ? 
C19 H19B 0.9900 . ? 
C4 C5 1.416(3) . ? 
C4 C3 1.415(2) . ? 
C4 C7 1.533(2) . ? 
C15 C16 1.541(2) . ? 
C15 H15A 0.9900 . ? 
C15 H15B 0.9900 . ? 
C13 C12 1.418(2) . ? 
C13 H13 0.9500 . ? 
C2 C3 1.414(2) . ? 
C2 H2 0.9500 . ? 
C11 C12 1.417(2) . ? 
C11 C14 1.538(2) . ? 
C12 H12 0.9500 . ? 
C5 C6 1.414(3) . ? 
C5 H5 0.9500 . ? 
C16 H16A 0.9800 . ? 
C16 H16B 0.9800 . ? 
C16 H16C 0.9800 . ? 
C6 H6 0.9500 . ? 
C3 H3 0.9500 . ? 
C18 H18A 0.9800 . ? 
C18 H18B 0.9800 . ? 
C18 H18C 0.9800 . ? 
C14 H14A 0.9800 . ? 
C14 H14B 0.9800 . ? 
C14 H14C 0.9800 . ? 
C20 H20A 0.9800 . ? 
C20 H20B 0.9800 . ? 
C20 H20C 0.9800 . ? 
C7 H7A 0.9800 . ? 
C7 H7B 0.9800 . ? 
C7 H7C 0.9800 . ? 
C3S C2S 1.506(16) . ? 
C3S C4S 1.546(11) . ? 
C3S H3S1 0.9900 . ? 
C3S H3S2 0.9900 . ? 
C4S O1S 1.445(5) . ? 
C4S H4S1 0.9900 . ? 
C4S H4S2 0.9900 . ? 
C2S C1S 1.552(13) . ? 
C2S H2S1 0.9900 . ? 
C2S H2S2 0.9900 . ? 
C1S O1S 1.493(11) . ? 
C1S H1S1 0.9900 . ? 
C1S H1S2 0.9900 . ? 
  
loop_ 
 _geom_angle_atom_site_label_1 
 _geom_angle_atom_site_label_2 
 _geom_angle_atom_site_label_3 
 _geom_angle 
 _geom_angle_site_symmetry_1 
 _geom_angle_site_symmetry_3 
 _geom_angle_publ_flag 
N2 Fe1 N1 115.68(7) . . ? 
N2 Fe1 S2 111.62(5) . . ? 
N1 Fe1 S2 103.60(5) . . ? 
N2 Fe1 S3 102.15(5) . . ? 
N1 Fe1 S3 112.17(5) . . ? 
S2 Fe1 S3 111.93(2) . . ? 
C19 N3 C15 111.77(12) . . ? 
C19 N3 C17 110.70(12) . . ? 
C15 N3 C17 106.04(12) . . ? 
C19 N3 C21 106.09(12) . . ? 
C15 N3 C21 111.03(12) . . ? 
C17 N3 C21 111.30(12) . . ? 
C8 S2 Fe1 109.49(5) . . ? 
O2 N2 Fe1 170.05(14) . . ? 
C1 S3 Fe1 107.85(6) . . ? 
O1 N1 Fe1 166.04(14) . . ? 
C18 C17 N3 115.24(13) . . ? 
C18 C17 H17A 108.5 . . ? 
N3 C17 H17A 108.5 . . ? 
C18 C17 H17B 108.5 . . ? 
N3 C17 H17B 108.5 . . ? 
H17A C17 H17B 107.5 . . ? 
C9 C8 C13 117.60(14) . . ? 
C9 C8 S2 122.75(12) . . ? 
C13 C8 S2 119.63(12) . . ? 
C2 C1 C6 117.31(15) . . ? 
C2 C1 S3 123.42(13) . . ? 
C6 C1 S3 119.22(13) . . ? 
C10 C9 C8 120.89(15) . . ? 
C10 C9 H9 119.6 . . ? 
C8 C9 H9 119.6 . . ? 
C22 C21 N3 114.62(13) . . ? 
C22 C21 H21A 108.6 . . ? 
N3 C21 H21A 108.6 . . ? 
C22 C21 H21B 108.6 . . ? 
N3 C21 H21B 108.6 . . ? 
H21A C21 H21B 107.6 . . ? 
C21 C22 H22A 109.5 . . ? 
C21 C22 H22B 109.5 . . ? 
H22A C22 H22B 109.5 . . ? 
C21 C22 H22C 109.5 . . ? 
H22A C22 H22C 109.5 . . ? 
H22B C22 H22C 109.5 . . ? 
C9 C10 C11 121.76(15) . . ? 
C9 C10 H10 119.1 . . ? 
C11 C10 H10 119.1 . . ? 
C20 C19 N3 115.07(14) . . ? 
C20 C19 H19A 108.5 . . ? 
N3 C19 H19A 108.5 . . ? 
C20 C19 H19B 108.5 . . ? 
N3 C19 H19B 108.5 . . ? 
H19A C19 H19B 107.5 . . ? 
C5 C4 C3 116.92(16) . . ? 
C5 C4 C7 122.56(16) . . ? 
C3 C4 C7 120.52(16) . . ? 
C16 C15 N3 115.39(13) . . ? 
C16 C15 H15A 108.4 . . ? 
N3 C15 H15A 108.4 . . ? 
C16 C15 H15B 108.4 . . ? 
N3 C15 H15B 108.4 . . ? 
H15A C15 H15B 107.5 . . ? 
C12 C13 C8 121.15(14) . . ? 
C12 C13 H13 119.4 . . ? 
C8 C13 H13 119.4 . . ? 
C3 C2 C1 120.80(16) . . ? 
C3 C2 H2 119.6 . . ? 
C1 C2 H2 119.6 . . ? 
C10 C11 C12 117.57(15) . . ? 
C10 C11 C14 120.81(15) . . ? 
C12 C11 C14 121.62(15) . . ? 
C11 C12 C13 121.02(15) . . ? 
C11 C12 H12 119.5 . . ? 
C13 C12 H12 119.5 . . ? 
C6 C5 C4 121.47(16) . . ? 
C6 C5 H5 119.3 . . ? 
C4 C5 H5 119.3 . . ? 
C15 C16 H16A 109.5 . . ? 
C15 C16 H16B 109.5 . . ? 
H16A C16 H16B 109.5 . . ? 
C15 C16 H16C 109.5 . . ? 
H16A C16 H16C 109.5 . . ? 
H16B C16 H16C 109.5 . . ? 
C5 C6 C1 121.24(16) . . ? 
C5 C6 H6 119.4 . . ? 
C1 C6 H6 119.4 . . ? 
C2 C3 C4 122.27(16) . . ? 
C2 C3 H3 118.9 . . ? 
C4 C3 H3 118.9 . . ? 
C17 C18 H18A 109.5 . . ? 
C17 C18 H18B 109.5 . . ? 
H18A C18 H18B 109.5 . . ? 
C17 C18 H18C 109.5 . . ? 
H18A C18 H18C 109.5 . . ? 
H18B C18 H18C 109.5 . . ? 
C11 C14 H14A 109.5 . . ? 
C11 C14 H14B 109.5 . . ? 
H14A C14 H14B 109.5 . . ? 
C11 C14 H14C 109.5 . . ? 
H14A C14 H14C 109.5 . . ? 
H14B C14 H14C 109.5 . . ? 
C19 C20 H20A 109.5 . . ? 
C19 C20 H20B 109.5 . . ? 
H20A C20 H20B 109.5 . . ? 
C19 C20 H20C 109.5 . . ? 
H20A C20 H20C 109.5 . . ? 
H20B C20 H20C 109.5 . . ? 
C4 C7 H7A 109.5 . . ? 
C4 C7 H7B 109.5 . . ? 
H7A C7 H7B 109.5 . . ? 
C4 C7 H7C 109.5 . . ? 
H7A C7 H7C 109.5 . . ? 
H7B C7 H7C 109.5 . . ? 
C2S C3S C4S 104.6(8) . . ? 
C2S C3S H3S1 110.8 . . ? 
C4S C3S H3S1 110.8 . . ? 
C2S C3S H3S2 110.8 . . ? 
C4S C3S H3S2 110.8 . . ? 
H3S1 C3S H3S2 108.9 . . ? 
O1S C4S C3S 104.8(7) . . ? 
O1S C4S H4S1 110.8 . . ? 
C3S C4S H4S1 110.8 . . ? 
O1S C4S H4S2 110.8 . . ? 
C3S C4S H4S2 110.8 . . ? 
H4S1 C4S H4S2 108.9 . . ? 
C3S C2S C1S 105.7(7) . . ? 
C3S C2S H2S1 110.6 . . ? 
C1S C2S H2S1 110.6 . . ? 
C3S C2S H2S2 110.6 . . ? 
C1S C2S H2S2 110.6 . . ? 
H2S1 C2S H2S2 108.7 . . ? 
O1S C1S C2S 103.9(7) . . ? 
O1S C1S H1S1 111.0 . . ? 
C2S C1S H1S1 111.0 . . ? 
O1S C1S H1S2 111.0 . . ? 
C2S C1S H1S2 111.0 . . ? 
H1S1 C1S H1S2 109.0 . . ? 
C4S O1S C1S 104.3(6) . . ? 
  
_diffrn_measured_fraction_theta_max    1.000 
_diffrn_reflns_theta_full              27.10 
_diffrn_measured_fraction_theta_full   1.000 
_refine_diff_density_max    0.390 
_refine_diff_density_min   -0.189 
_refine_diff_density_rms    0.060 
